# Supplementary material for: Hybrid double-spiral microfluidic chip for RBC-lysis-free enrichment of rare cells from whole blood
Source: Royal Society of Chemistry journal article supplement (doi:10.1039/d2lc00713d), 2022-01-01
Supplement: d2lc00713d1.pdf [file d2lc00713d1.pdf]

Supplementary Information for

## Hybrid Double Spiral Microfluidic Chip for RBC-Lysis-free Enrichment of Rare Cells from Whole Blood

Kentaro Shirai,<sup>at</sup> Guofeng □ Guan,<sup>b,i</sup> Tan Meihui,<sup>b</sup> Peng Xiaoling,<sup>a</sup> Yuma Oka,<sup>a</sup> Yusuke Takahashi,<sup>a</sup> Ali Asgar S. Bhagat,<sup>b,ii</sup> Masatoshi Yanagida,<sup>a</sup> Shigeki Iwanaga,<sup>a</sup> Nobuaki Matsubara,<sup>c</sup> Toru Mukohara,<sup>c</sup> Tomokazu Yoshida<sup>at</sup>

---

*a. Sysmex Corporation, 4-4-4, Takatsuka-dai, Nishi-ku, Kobe, Hyogo, Japan*

*b. Biolidics Limited, 37 Jalan Pemimpin, Singapore 577177*

*c. Department of Medical Oncology, National Cancer Center Hospital East, Kashiwanoha, Kashiwa, Japan*

† Corresponding authors

---

<sup>i</sup> Current address: Shenzhen Genflow Technologies Co., Ltd., Shenzhen, 518000, China.

<sup>ii</sup> Current address: Department of Biomedical Engineering, College of Design and Engineering, National University of Singapore, Engineering Drive 1, Singapore 117575, Singapore.  
Institute for Health Innovation and Technology (iHealthtech), National University of Singapore, 15 Kent Ridge Crescent, Singapore 119276, Singapore

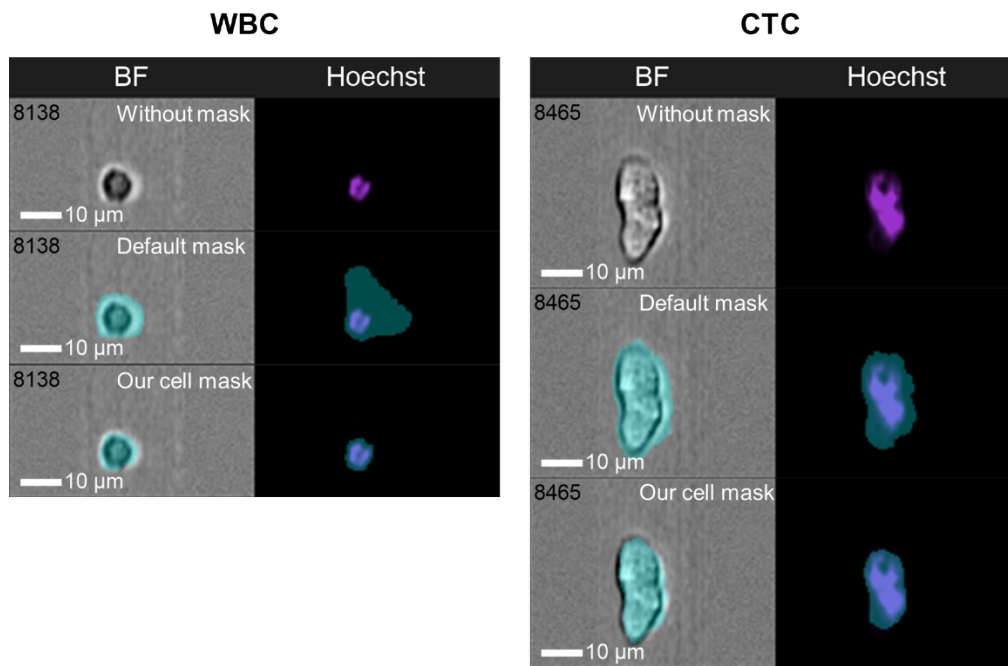

**SI Figure 1.** Cell size determination by using our cell mask. Images were taken from the breast cancer patient blood sample.

Default mask

**BF:** M09, **Hoechst:** M07

Our cell mask

**BF:** Erode(M09, 3) Or Object(M07, Hoechst, Tight), **Hoechst:** Object(M07, Hoechst, Tight)

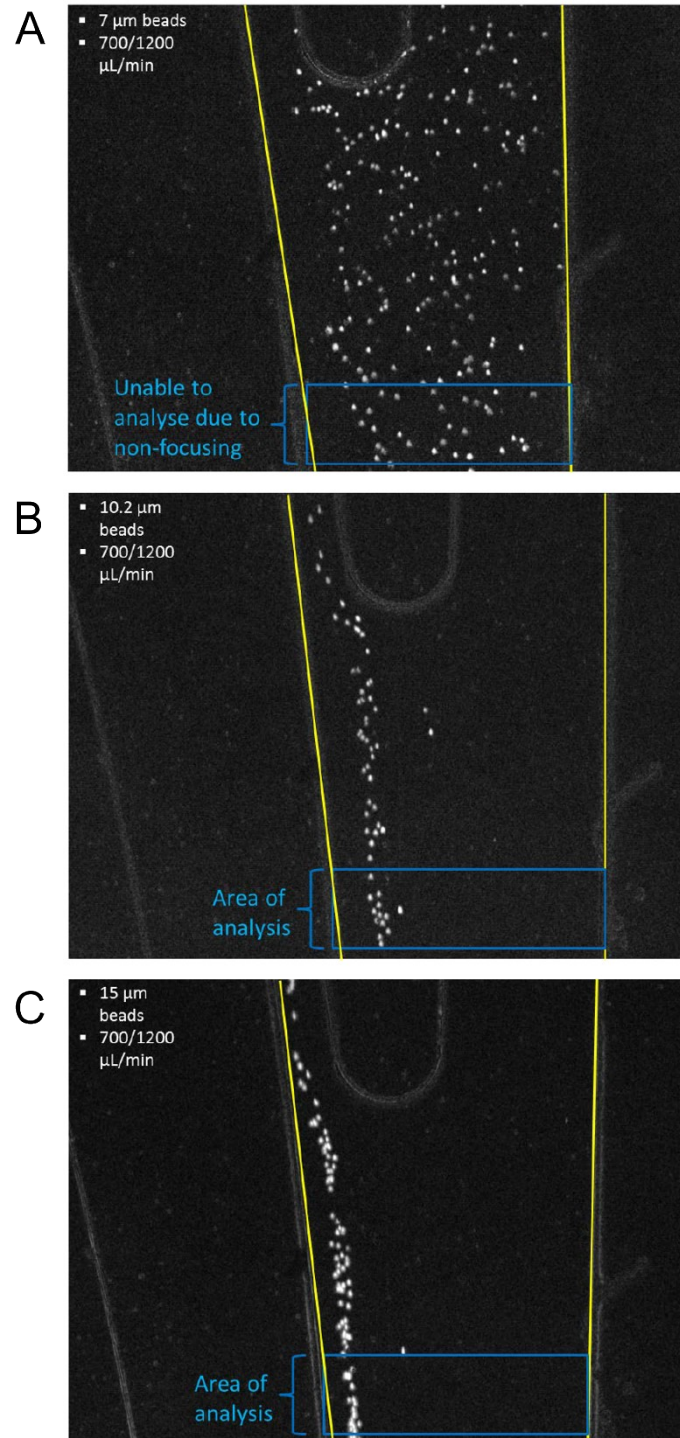

**SI Figure 2.** Size cutoff validation results of RBC removal chip (a half-Dean cycle chip) using microbeads of (A)7, (B)10.2, (C)15  $\mu\text{m}$ . Videos of at least 30 frames near output bifurcation were taken for each under bright field. All the slices were processed by Z project the *Standard Deviation* using Image J software.

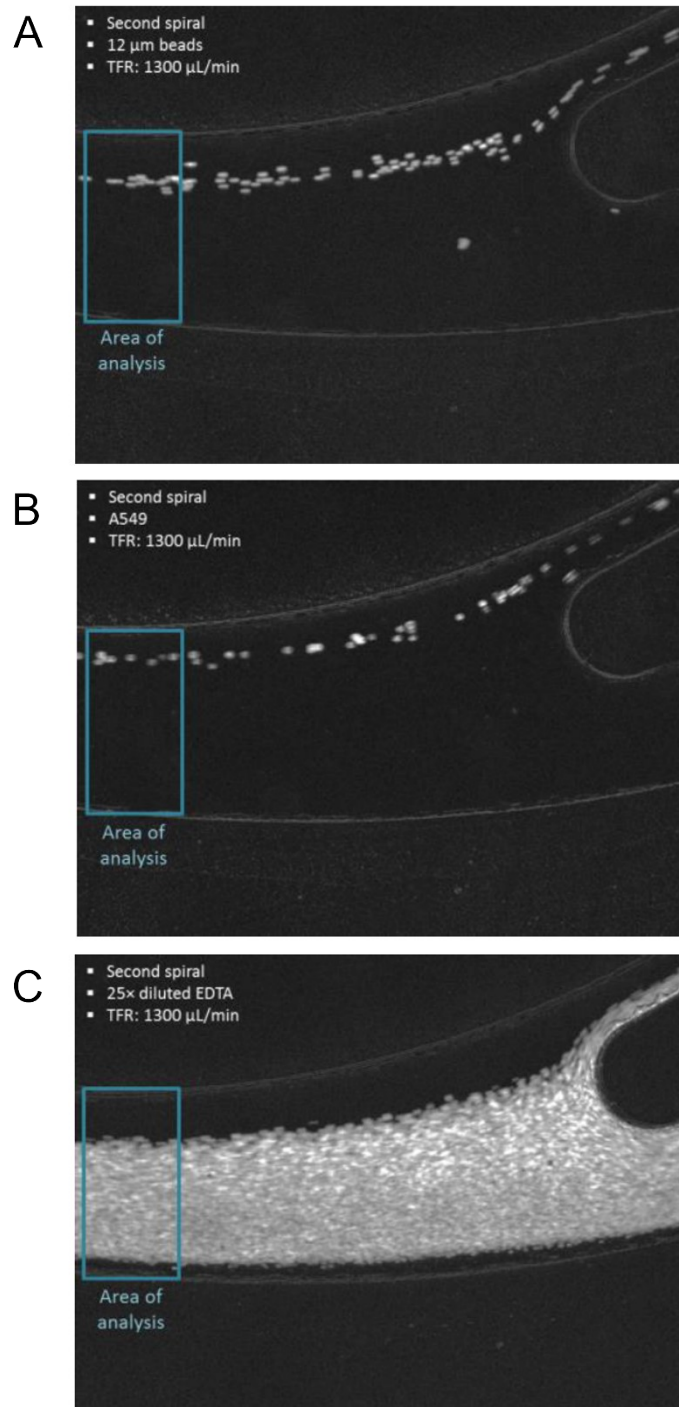

**SI Figure 3.** Size cutoff validation results of CTC/WBC separation chip (2<sup>nd</sup> spiral, a full-Dean cycle) of hybrid double spiral chip using (A)12  $\mu\text{m}$  microbeads, (B)A549 cell line, (C)25X diluted EDTA blood. Measurement and analysis were performed with the same method as SI Figure 2.

**SI Table 1.** Conditions of cell staining and imaging flow cytometry detection

| Cancer   | Marker            | Staining                |                            | Imaging flow cytometry detection(*) |                   |                         |
|----------|-------------------|-------------------------|----------------------------|-------------------------------------|-------------------|-------------------------|
|          |                   | Fix/Perm                | Dye                        | Channel                             | Feature           | Posi/Nega gating cutoff |
| Breast   | Bright field (BF) | 2% PFA/<br>70% Methanol | -                          | Ch09                                | -                 | -                       |
|          | Nucleus           |                         | Hoechst33142               | Ch07                                | Intensity_MC_Ch07 | 10000                   |
|          | Cytokeratin       |                         | Anti-CK-<br>eFluor570      | Ch03                                | Intensity_MC_Ch03 | 50000                   |
|          | CD45/16/34        |                         | Anti-CD45/16/34-<br>BV605  | Ch10                                | Intensity_MC_Ch10 | 10000                   |
| Prostate | Bright field (BF) | 2% PFA/<br>0.5% Saponin | -                          | Ch09                                | -                 | -                       |
|          | Nucleus           |                         | Hoechst33142               | Ch07                                | Intensity_MC_Ch07 | 5000                    |
|          | Cytokeratin       |                         | Anti-CK-FITC               | Ch02                                | Intensity_MC_Ch02 | 10000                   |
|          | CD45/16/34        |                         | Anti-CD45/16/34-<br>PE-Cy7 | Ch06                                | Intensity_MC_Ch06 | 25000                   |

(\*) Conditions of laser power intensity

Breast 405nm:40mW, 488nm:200mW, 561nm:200mW, 642nm:150mW

Prostate 405nm:40mW, 488nm:200mW, 561nm:off, 642nm:150mW

**SI Table 2.** A549 recovery rate [%] of RBC removal chip separation

|      | Donor 3 | Donor 4 | Donor 5 |
|------|---------|---------|---------|
| Run1 | 100.5   | 92.2    | 92.5    |
| Run2 | 97.4    | 82.9    | 90.5    |
| Run3 | 108.7   | 93.6    | 112.8   |
| AVG  | 102.2   | 89.6    | 98.6    |
| SD   | 5.8     | 5.8     | 12.4    |

**SI Table 3.** Cell numbers in CTC recovery solution of hybrid double spiral chip separation

| Donor | Run | Cell counts in CTC recovery solution |             |              |          |       | Relative cell count ratio of each cell type |       |         | A549 purity% in WBC(*) |
|-------|-----|--------------------------------------|-------------|--------------|----------|-------|---------------------------------------------|-------|---------|------------------------|
|       |     | RBC [cells]                          | WBC [cells] | A549 [cells] |          |       | RBC %                                       | WBC % | A549 %  |                        |
|       |     |                                      |             | Spike        | Recovery |       |                                             |       |         |                        |
| 6     | 1   | 8.2.E+06                             | 1.1.E+06    | 232          | 175      | 75.4% | 88.4%                                       | 11.6% | 0.0019% | 0.02%                  |
|       | 2   | 1.7.E+06                             | 3.3.E+05    | 143          | 116      | 81.1% | 84.2%                                       | 15.8% | 0.0056% | 0.04%                  |
|       | 3   | 5.2.E+07                             | 1.8.E+06    | 180          | 129      | 71.7% | 96.7%                                       | 3.3%  | 0.0002% | 0.01%                  |
| 7     | 1   | 9.2.E+05                             | 5.3.E+04    | 300          | 264      | 88.0% | 94.5%                                       | 5.4%  | 0.0271% | 0.50%                  |
|       | 2   | 5.1.E+05                             | 9.8.E+04    | 315          | 290      | 92.1% | 84.0%                                       | 16.0% | 0.0475% | 0.30%                  |
|       | 3   | 8.4.E+05                             | 1.6.E+05    | 310          | 289      | 93.2% | 84.3%                                       | 15.6% | 0.0289% | 0.18%                  |
| 8     | 1   | 1.2.E+07                             | 1.5.E+05    | 211          | 186      | 88.2% | 98.7%                                       | 1.3%  | 0.0015% | 0.12%                  |
|       | 2   | 5.1.E+05                             | 1.2.E+05    | 242          | 182      | 75.2% | 80.3%                                       | 19.7% | 0.0289% | 0.15%                  |
|       | 3   | 1.1.E+06                             | 6.8.E+04    | 205          | 151      | 73.7% | 94.0%                                       | 6.0%  | 0.0133% | 0.22%                  |
| 9     | 1   | 2.6.E+06                             | 1.2.E+05    | 243          | 214      | 88.1% | 95.6%                                       | 4.4%  | 0.0078% | 0.18%                  |
|       | 2   | 9.1.E+06                             | 8.4.E+04    | 265          | 224      | 84.5% | 99.1%                                       | 0.9%  | 0.0024% | 0.27%                  |
|       | 3   | 2.1.E+07                             | 2.3.E+05    | 269          | 252      | 93.7% | 98.9%                                       | 1.1%  | 0.0012% | 0.11%                  |
| 10    | 1   | 2.8.E+07                             | 1.4.E+05    | 253          | 216      | 85.4% | 99.5%                                       | 0.5%  | 0.0008% | 0.16%                  |
|       | 2   | 1.9.E+07                             | 1.1.E+05    | 244          | 226      | 92.6% | 99.4%                                       | 0.6%  | 0.0012% | 0.21%                  |
|       | 3   | 9.6.E+06                             | 7.9.E+04    | 265          | 236      | 89.1% | 99.2%                                       | 0.8%  | 0.0024% | 0.30%                  |

(\*) A549 Purity% in WBC was defined as the percentage ratio of cell numbers of A549 cells to cell numbers of WBCs
